# Supplementary material for: Selenium nanoparticles alleviate ischemia reperfusion injury-induced acute kidney injury by modulating GPx-1/NLRP3/Caspase-1 pathway
Source: PubMed Central journal article supplement (PMC9131270; doi:10.7150/thno.70830), 2022-05-09

## **Supplementary Material**

### **Selenium nanoparticles alleviate ischemia reperfusion injury-induced acute kidney injury by modulating GPx-1/NLRP3/Caspase-1 pathway**

Shaobo Wang, Yin Chen, Songling Han, Yong Liu, Jining Gao, Yinghui Huang, Wei Sun, Junping Wang, Cheng Wang, Jinghong Zhao

Corresponding authors: E-mail: zhaojh@tmmu.edu.cn, wangctmmu@126.com, wangjunping@tmmu.edu.cn

#### **Table of contents:**

**Table S1.** Antibodies applied in the immunofluorescence staining

**Table S2.** Antibodies applied in the immunohistochemistry staining

**Table S3.** Sequences of primers used in q-PCR

**Table S4.** Antibodies applied in the Western blotting

**Figure S1.** SDS-PAGE determining the existence of BSA in the NPs

**Figure S2.** Zeta potential and particle size of different batches of Se@BSA NPs

**Figure S3.** Changes in body weight at day 7 post Se@BSA NP treatment

**Figure S4.** Changes in ALT and AST levels at day 7 post Se@BSA NP treatment

**Figure S5.** Changes in mouse hemogram at day 7 post Se@BSA NP treatment

**Figure S6.** ICP-MS detecting the Se contents in serum post Se@BSA NP treatment

**Figure S7.** ICP-MS detecting the Se contents in HK-2 cells post Se@BSA NP treatment

**Figure S8.** Tubular injury score of IRI-AKI mouse

**Figure S9.** NLRP3 mRNA expression in HK-2 cells

**Figure S10.** Induced expression of GPx-1 in HK-2 cells by Se@BSA NPs

**Table S1.** Antibodies applied in the immunofluorescence staining

| <b>Proteins</b> | <b>Primary Antibodies</b>                    | <b>Secondary Antibodies</b>       |
|-----------------|----------------------------------------------|-----------------------------------|
| Mouse AQP1      | 1:100, sc-25287 ( Santa Cruz, Shanghai, CHN) | Cy3, A0521 (Beyotime)             |
| NLRP3           | 1:200, bs-23722R (Bioss, Beijing, CHN)       | Alexa Fluor 488, A0423 (Beyotime) |
| GPx-1           | 1:100, AF7017 (Beyotime)                     | Cy3, A0516 (Beyotime)             |
| Fibronectin     | 1:100, ab2413 (Abcam, Shanghai, CHN)         | Cy3, A0516 (Beyotime)             |
| $\alpha$ -Sma   | 1:200, 19245 (CST, Shanghai, CHN)            | Cy3, A0516 (Beyotime)             |

**Table S2.** Antibodies applied in the immunohistochemistry staining

| <b>Proteins</b> | <b>Primary Antibodies</b> | <b>Secondary Antibodies</b>       |
|-----------------|---------------------------|-----------------------------------|
| Kim-1           | 1:100, ab78494 (Abcam)    | ZLI-9019 (ZSGB-BIO, Beijing, CHN) |
| IL-1 $\beta$    | 1:100, ab283818 (Abcam)   | ZLI-9019 (ZSGB-BIO)               |
| IL-18           | 1:100, ab191860 (Abcam)   | ZLI-9019 (ZSGB-BIO)               |
| Collagen I      | 1:1000, 81375 (CST)       | ZLI-9019 (ZSGB-BIO)               |

**Table S3.** Sequences of primers used in q-PCR

| Species | Name           | Sequence (5'-3') | Product length         |     |
|---------|----------------|------------------|------------------------|-----|
| Mouse   | Kim-1          | Forward          | CAGGGTCTCCTTCACAGCAG   | 172 |
|         |                | Reverse          | CCACCACCCCCTTTACTTCC   |     |
|         | GPx-1          | Forward          | AATGTCGCGTCTCTCTGAGG   | 117 |
|         |                | Reverse          | TCCGAAGTATTGCACGGG     |     |
|         | NLRP3          | Forward          | ATCAACAGGCGAGACCTCTG   | 96  |
|         |                | Reverse          | GTCCTCCTGGCATAACCATAGA |     |
|         | IL-1 $\beta$   | Forward          | TTCAGGCAGGCAGTATCACTC  | 166 |
|         |                | Reverse          | CCAGCAGGTTATCATCATCA   |     |
|         | IL-18          | Forward          | CCAGACCAGACTGATAATATAC | 110 |
|         |                | Reverse          | TCTTGTTCTTACAGGAGAGG   |     |
|         | $\beta$ -actin | Forward          | CACTGTCGAGTCGCGTCC     | 89  |
|         |                | Reverse          | TCATCCATGGCGAACTGGTG   |     |
| Human   | Kim-1          | Forward          | CTTCTAACTAACCGGCTGATCC | 244 |
|         |                | Reverse          | TTCCGATAGGTGACGTGGGT   |     |
|         | GPx-1          | Forward          | CAGTCGGTGTATGCCTTCTCG  | 105 |
|         |                | Reverse          | GAGGGACGCCACATTCTCG    |     |
|         | NLRP3          | Forward          | GATCTTCGCTGCGATCAACAG  | 81  |
|         |                | Reverse          | CGTGCATTATCTGAACCCAC   |     |
|         | IL-1 $\beta$   | Forward          | AGCCATGGCAGAAGTACCTG   | 116 |
|         |                | Reverse          | CCTGGAAGGAGCACTTCATCT  |     |
|         | IL-18          | Forward          | ATCGCTTCCTCTCGCAACAA   | 223 |
|         |                | Reverse          | GAGGCCGATTTCTTGGTCA    |     |
|         | $\beta$ -actin | Forward          | GATTCCTATGTGGGCGACGA   | 229 |
|         |                | Reverse          | AGGTCTCAAACATGATCTGGGT |     |

**Table S4.** Antibodies applied in the Western blotting

| <b>Proteins</b> | <b>Primary Antibodies</b>  | <b>Secondary Antibodies</b> |
|-----------------|----------------------------|-----------------------------|
| $\beta$ -actin  | 1:1000, AF50017 (Beyotime) | A0216 (Beyotime)            |
| Kim-1           | 1:1000, ab78494 (Abcam)    | A0208 (Beyotime)            |
| NLRP3           | 1:1000, bs-23722R (Bioss)  | A0208 (Beyotime)            |
| IL-1 $\beta$    | 1:1000, ab283818 (Abcam)   | A0208 (Beyotime)            |
| Mouse IL-18     | 1:1000, ab191860 (Abcam)   | A0208 (Beyotime)            |
| Human IL-18     | 1:1000, ab243295 (Abcam)   | A0208 (Beyotime)            |
| Caspase-1       | 1:1000, ab138483 (Abcam)   | A0208 (Beyotime)            |
| GPx-1           | 1:1000, AF7017 (Beyotime)  | A0208 (Beyotime)            |
| Fibronectin     | 1:1000, ab2413 (Abcam)     | A0208 (Beyotime)            |
| $\alpha$ -Sma   | 1:1000, 19245 (CST)        | A0208 (Beyotime)            |
| Collagen I      | 1:1000, 81375 (CST)        | A0208 (Beyotime)            |

**Figure S1.** SDS-PAGE determining the existence of BSA in the NPs. A total of 200  $\mu\text{g}$  of Se@BSA NPs was dissolved in 25  $\mu\text{L}$  PBS. After a high speed centrifugation at 12 000 g for 15 min, the supernatant was collected. The precipitate was further dissolved in 25  $\mu\text{L}$  PBS and heated for denaturation. Proteins were resolved by 10% SDS-PAGE and stained with Coomassie brilliant blue. BSA (5  $\mu\text{g}$ ) was employed as the positive control.

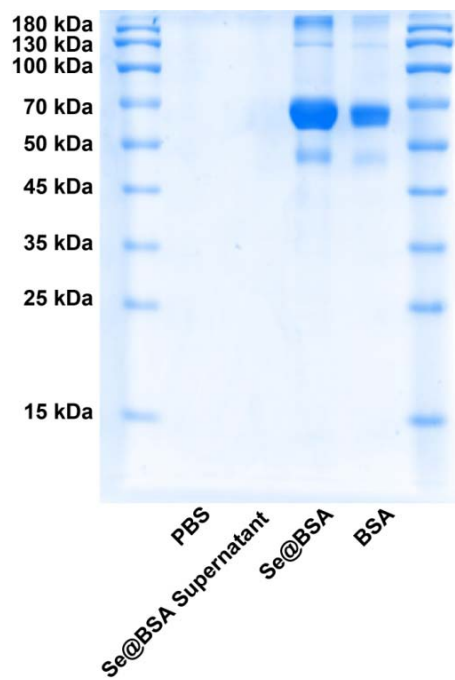

**Figure S2.** Zeta potential and particle size of different batches of Se@BSA NPs. (A) Zeta potential determination. (B) DLS detection of the hydrodynamic diameters of Se@BSA NPs.

The results are presented as the mean  $\pm$  SD.

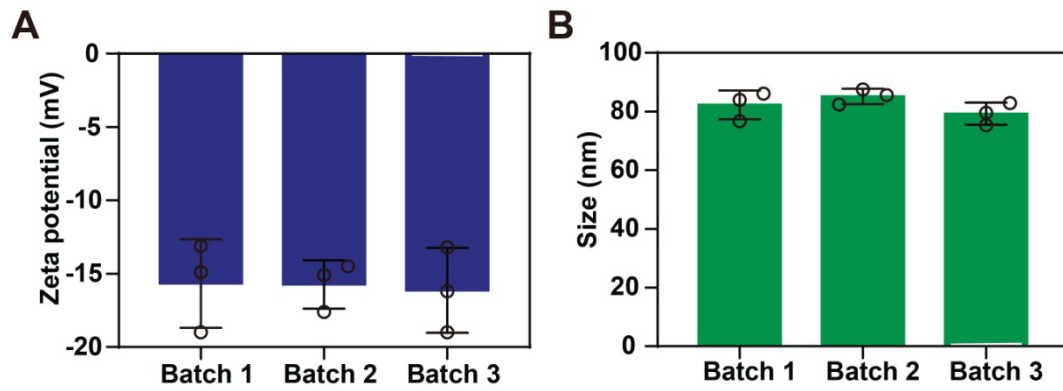

**Figure S3.** Changes in body weight at day 7 post Se@BSA NP treatment. Intravenous injection of 20 mg/kg Se@BSA NPs was innocuous to C57 mice. Mice in the sham group were treated with sterile PBS. n.s., not significantly.

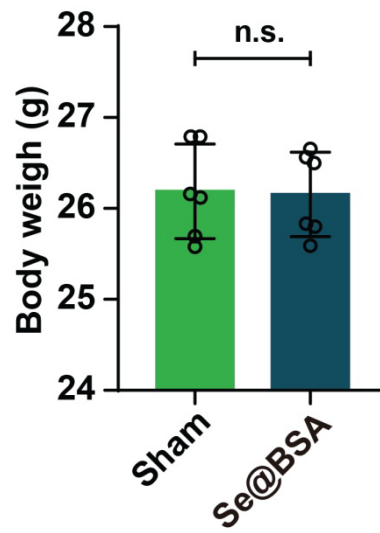



**Figure S4.** Changes in ALT and AST levels at day 7 post Se@BSA NP treatment. ALT and AST contents in mouse blood were determined by ELISA (SEA207Mu and SEB214Mu, CLOUD-CLONE CORP., Katy, TX, USA). n.s., not significantly.

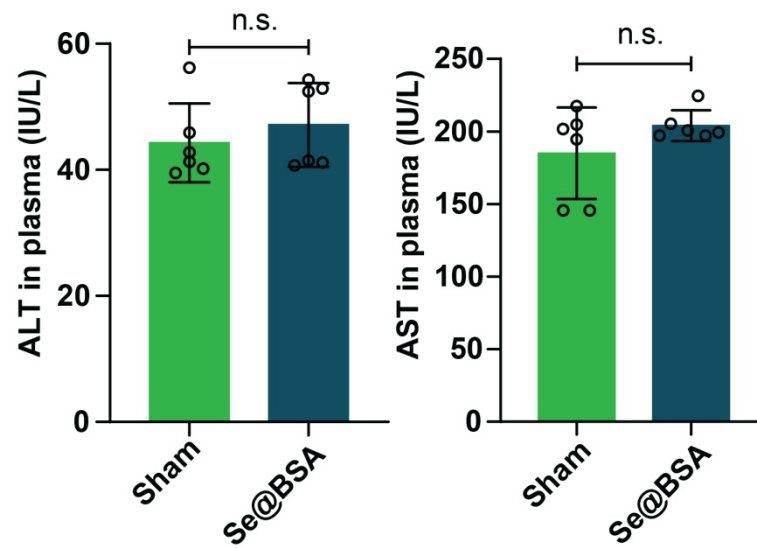

**Figure S5.** Changes in mouse hemogram at day 7 post Se@BSA NP treatment. Mouse blood was obtained at day 7 post Se@BSA NP (20 mg/kg, I.V.) treatment. Shown are the changes of (A) red blood cells, (B) white blood cells, (C) platelets, and (D) hemoglobin. n.s., not significantly.

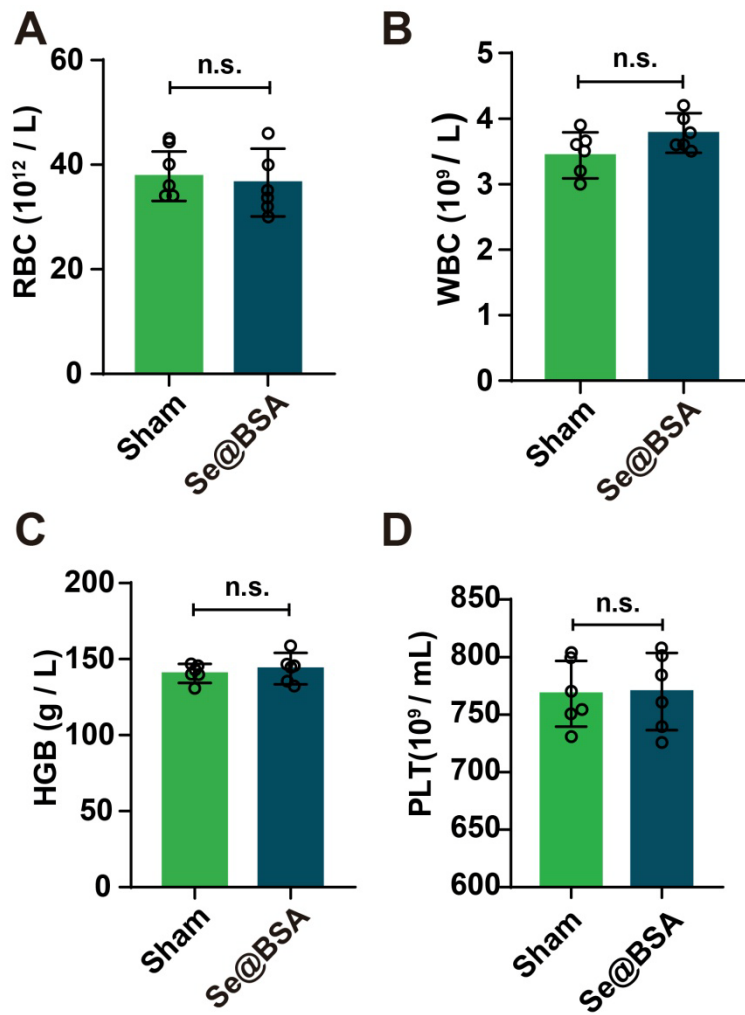

**Figure S6.** ICP-MS detecting the Se contents in serum post Se@BSA NP treatment. Mouse blood (20  $\mu$ L) was obtained at 3, 6, 12, and 24 h post Se@BSA NP (1 mg/kg, I.V.) treatment. Samples were processed with 0.5 mL nitrohydrochloric acid for 24 h and adjusted to 1 mL, in which the Se contents were determined by ICP-MS. The results are presented as the mean  $\pm$  SD.

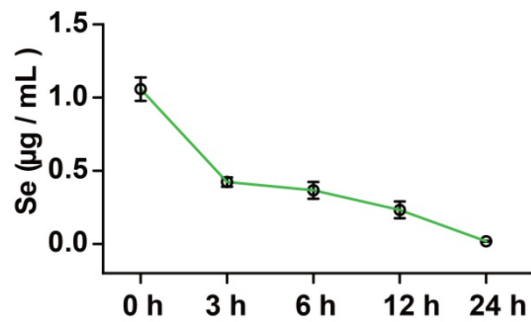

**Figure S7.** ICP-MS detecting the Se contents in HK-2 cells post Se@BSA NP treatment. Se@BSA NPs (50  $\mu\text{g}/\text{mL}$ ) were coincubated with  $2 \times 10^8$  CFU HK-2 cells at 37 °C for 6 h. The cells were collected and processed with 2 mL nitrohydrochloric acid for 24 h. After dilution to 5 mL with 2% salpeter solution, the Se contents in the samples were determined by ICP-MS. The results are presented as the mean  $\pm$  SD. **\*\*\***,  $P < 0.001$ .

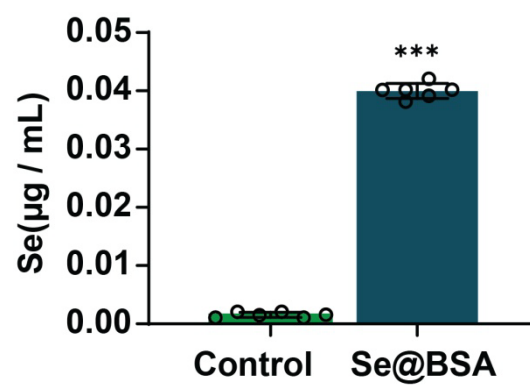

**Figure S8.** Tubular injury score of IRI-AKI mouse. The results are shown as the mean  $\pm$  SD.

\*\*\*,  $P < 0.001$ .

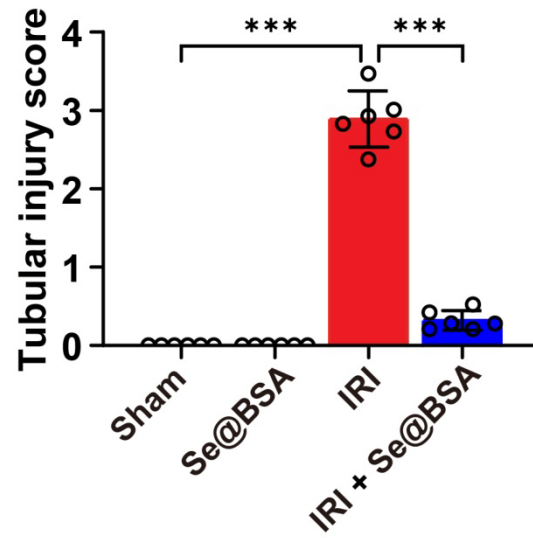

**Figure S9.** NLRP3 mRNA expression in HK-2 cells. H/R cells were exposed to different concentrations of NPs for 6 h.  $\beta$ -actin was used as the reference. The results are shown as the mean  $\pm$  SD. \*,  $P < 0.05$ ; \*\*\*,  $P < 0.001$ .

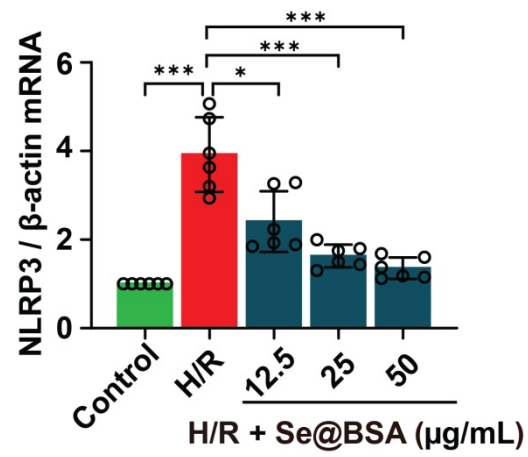

**Figure S10.** Induced expression of GPx-1 in HK-2 cells by Se@BSA NPs. (A) q-PCR detecting the mRNA expression of GPx-1. The results are shown as the mean  $\pm$  SD. \*,  $P < 0.05$ ; \*\*,  $P < 0.01$ ; \*\*\*,  $P < 0.001$ . (B) Western blotting revealing the dose-dependent modulation of Se@BSA NPs on GPx-1 expression in HK-2 cells.  $\beta$ -actin was used as the reference.

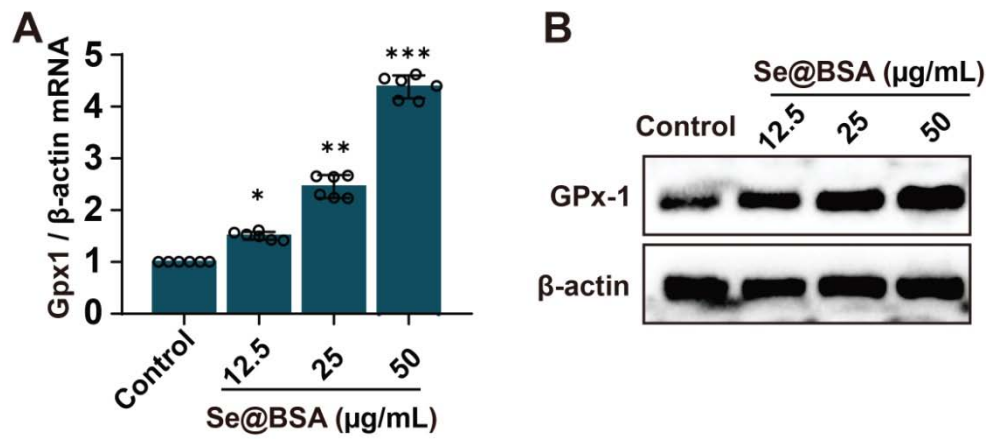

Supplement: thnov12p3882s1.pdf [file thnov12p3882s1.pdf]
